# Supplementary material for: Improvements in Maternal Cardiovascular Health Over the Perinatal Period Longitudinally Predict Lower Postpartum Psychological Distress Among Individuals Who Began Their Pregnancies With Overweight or Obesity
Source: PubMed Central journal article supplement — J Am Heart Assoc. 2024 Jun 14;13(12):e034153. doi: 10.1161/JAHA.123.034153 (PMC11255758; doi:10.1161/jaha.123.034153), 2024-06-14
Supplement: JAH3-13-e034153-s001.pdf [file JAH3-13-e034153-s001.pdf]

# **SUPPLEMENTAL MATERIAL**

**Table S1. Associations between the changes in CVH excluding sleep from baseline to six-months postpartum and postpartum psychological functioning.**

| Coefficient                               | OR (SE)              | <i>p</i>         |
|-------------------------------------------|----------------------|------------------|
| (Intercept)                               | 0.042 (1.817)        | 0.082            |
| <b>Change in CVH scores from T0 to T6</b> | <b>0.976 (0.012)</b> | <b>0.037</b>     |
| T0 CVH scores                             | 1.007 (0.013)        | 0.549            |
| <b>T0 CES-D scores</b>                    | <b>1.088 (0.019)</b> | <b>&lt;0.001</b> |
| T0 Age                                    | 1.026 (0.038)        | 0.502            |
| T0 Gestational age in weeks               | 1.022 (0.076)        | 0.774            |
| High school graduate/GED                  | 0.544 (0.572)        | 0.288            |
| Some college or technical school          | 0.669 (0.532)        | 0.451            |
| <b>Four-year college degree</b>           | <b>0.149 (0.918)</b> | <b>0.038</b>     |
| <b>Postgraduate degree</b>                | <b>0.098 (1.093)</b> | <b>0.034</b>     |
| Black racial identity                     | 0.901 (0.474)        | 0.826            |
| Other racial identity                     | 2.145 (0.666)        | 0.252            |
| Annual household income > \$30,000        | 1.171 (0.611)        | 0.796            |

*Note.* Because the Asian and American Indian or Alaska Native racial identity categories only had one member each, it was not possible to estimate their effects on odds of exceeding a score of 16 on the CES-D. Therefore, we collapsed the racial identity variable to White racial identity, Black racial identity, and other racial identity categories for logistic regressions models. Reference groups for categorical variables are as follows: White racial identity; less than a high school education or equivalent; annual household income ≤ \$30,000. Bolded *p*-values indicate statistical significance ( $p < 0.05$ ). T0 = baseline assessment; T6 = postpartum assessment; CES-D = Center for Epidemiologic Studies Depression Scale; PSS = Perceived Stress Scale; CVH = cardiovascular health; GED = General Educational Development.

**Table S2. Associations between the changes in CVH including sleep from baseline to six-months postpartum and postpartum psychological functioning. (N=114)**

| Coefficient                        | OR (SE)              | <i>p</i>         |
|------------------------------------|----------------------|------------------|
| (Intercept)                        | 0.042 (3.924)        | 0.483            |
| Change in CVH scores from T0 to T6 | 0.976 (0.019)        | 0.936            |
| T0 CVH scores                      | 1.007 (0.025)        | 0.868            |
| <b>T0 CES-D scores</b>             | <b>1.088 (0.035)</b> | <b>&lt;0.001</b> |
| T0 Age                             | 1.026 (0.069)        | 0.091            |
| T0 Gestational age in weeks        | 1.022 (0.134)        | 0.608            |
| <b>High school graduate/GED</b>    | <b>0.544 (1.143)</b> | <b>0.040</b>     |
| Some college or technical school   | 0.669 (1.032)        | 0.234            |
| <b>Four-year college degree</b>    | <b>0.149 (1.564)</b> | <b>0.015</b>     |
| <b>Postgraduate degree</b>         | <b>0.098 (1.699)</b> | <b>0.032</b>     |
| Black racial identity              | 0.901 (0.805)        | 0.550            |
| Other racial identity              | 2.145 (1.178)        | 0.106            |
| Annual household income > \$30,000 | 1.171 (0.955)        | 0.102            |

*Note.* Because the Asian and American Indian or Alaska Native racial identity categories only had one member each, it was not possible to estimate their effects on odds of exceeding a score of 16 on the CES-D. Therefore, we collapsed the racial identity variable to White racial identity, Black racial identity, and other racial identity categories for logistic regressions models. Reference groups for categorical variables are as follows: White racial identity; less than a high school education or equivalent; annual household income ≤ \$30,000. Bolded *p*-values indicate statistical significance ( $p < 0.05$ ). T0 = baseline assessment; T6 = postpartum assessment; CES-D = Center for Epidemiologic Studies Depression Scale; PSS = Perceived Stress Scale; CVH = cardiovascular health; GED = General Educational Development.
